# Supplementary material
Source: Springer Nature journal article supplement (https://www.springermedizin.de/resource/supplementary/12885_2010_2778_MOESM2_ESM.pdf/9461800)

# A

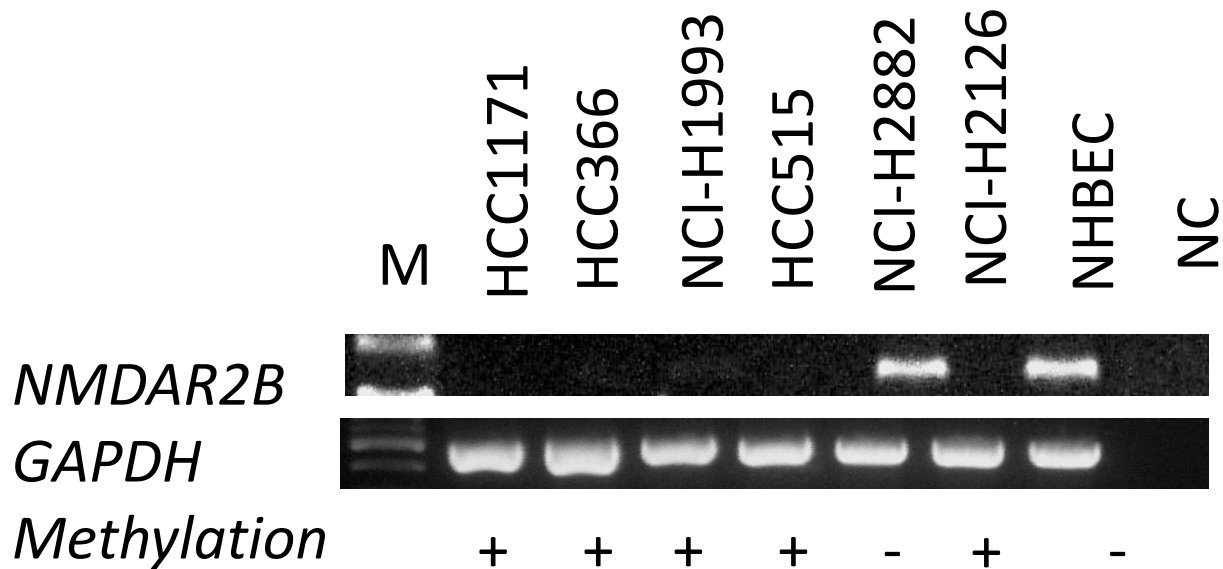

# B

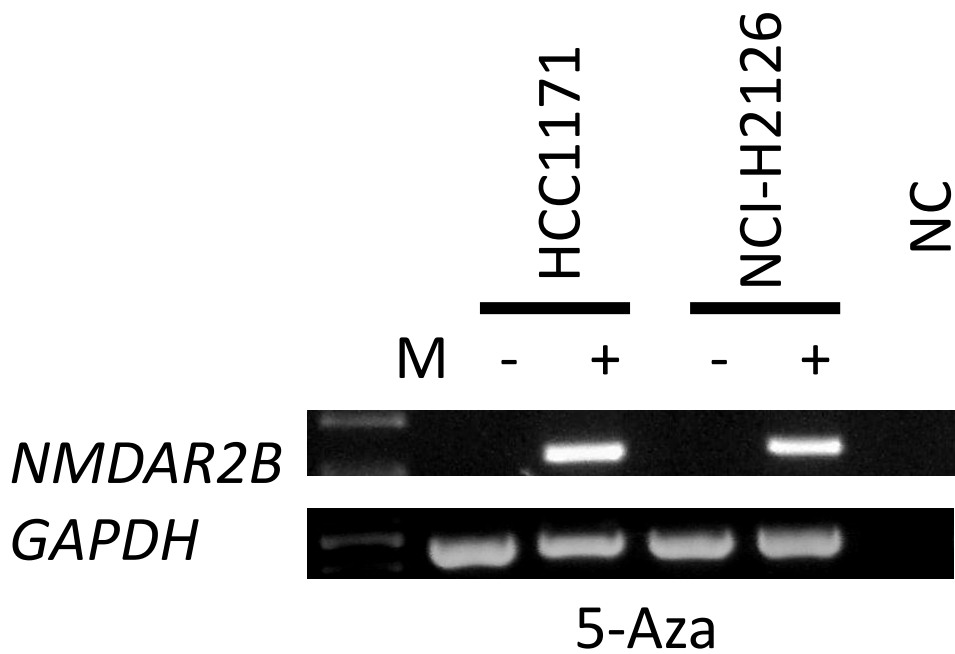

Supplement: MOESM2 [file 9461800]
